# Supplementary material for: Strategies to Prevent Biofilm Infections on Biomaterials: Effect of Novel Naturally-Derived Biofilm Inhibitors on a Competitive Colonization Model of Titanium by <em>Staphylococcus aureus </em>and Human Cells
Source: Preprints.org preprint supplement (doi:10.20944/preprints201912.0164.v1), 2019-12-12
Supplement: Supplementary file 1 [file Supplementary Information (all files).docx]

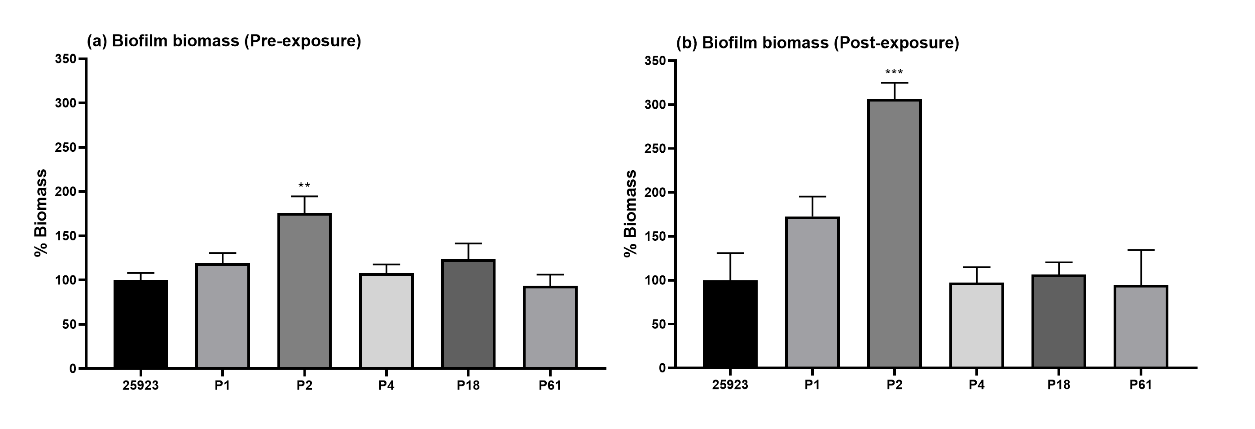


**Figure S1**. Biofilm biomass of *S. aureus* and five clinical strains. “*” represents differences with *S. aureus* 25923. Results are expressed as mean ± SEM of three biological replicates, with three technical replicates per condition.


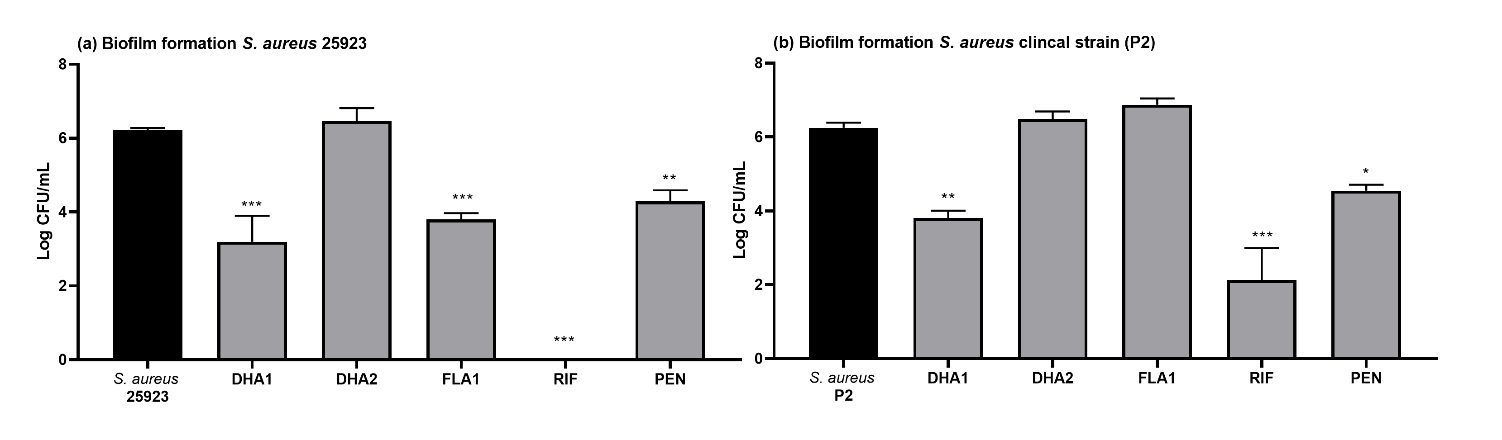


**Figure S2**. Effect of the two DHA derivatives (11 and 9b), the flavonoid-derivative (291) on the prevention of biofilm formation of (a) S. aureus 25923 or (b) S. aureus P2 on titanium surfaces. “*” represents differences with the untreated control (*S. aureus*). Results are expressed as mean ± SEM of three biological replicates, with three technical replicates per condition.


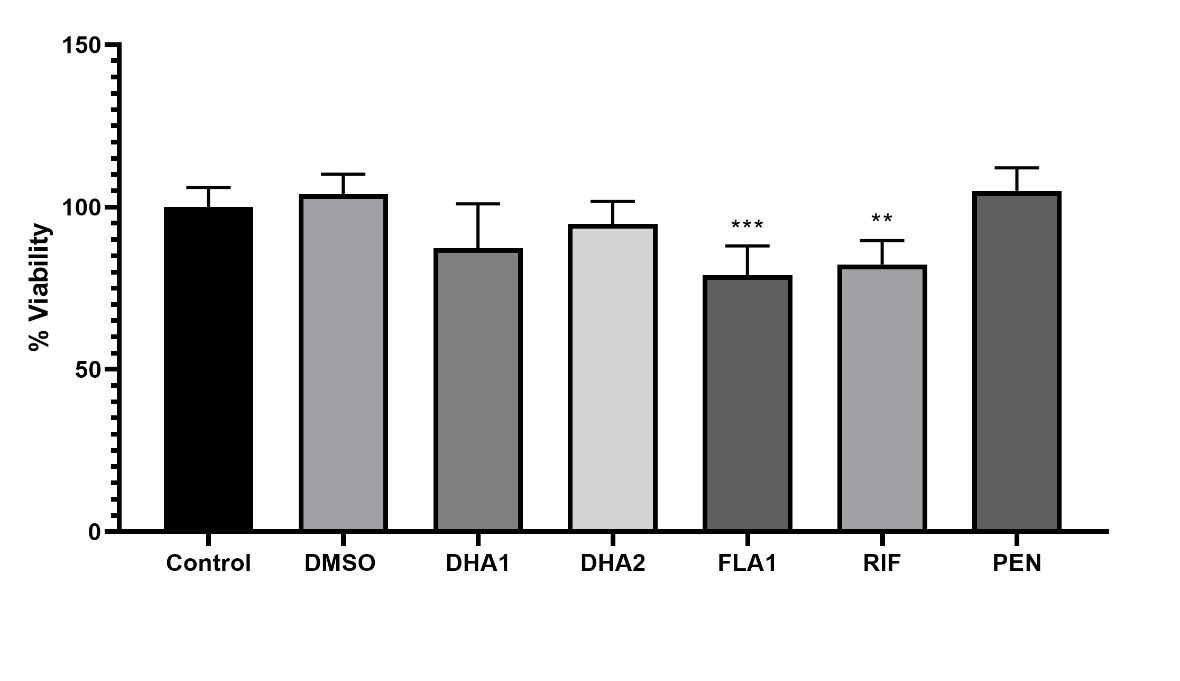


**Figure 3.** Effect of the two DHA derivatives (11 and 9b), the flavonoid-derivative (291) and two control antibiotics (Rifampicin and Penicillin) on SaOS-2 viability when cultured in 96 wells polystyrene plates. Compounds were tested at a concentration of 50 µM. The viability percentage was calculated with respect to untreated controls after 24 h incubation. Results are expressed as mean ± SEM of two different biological replicates.


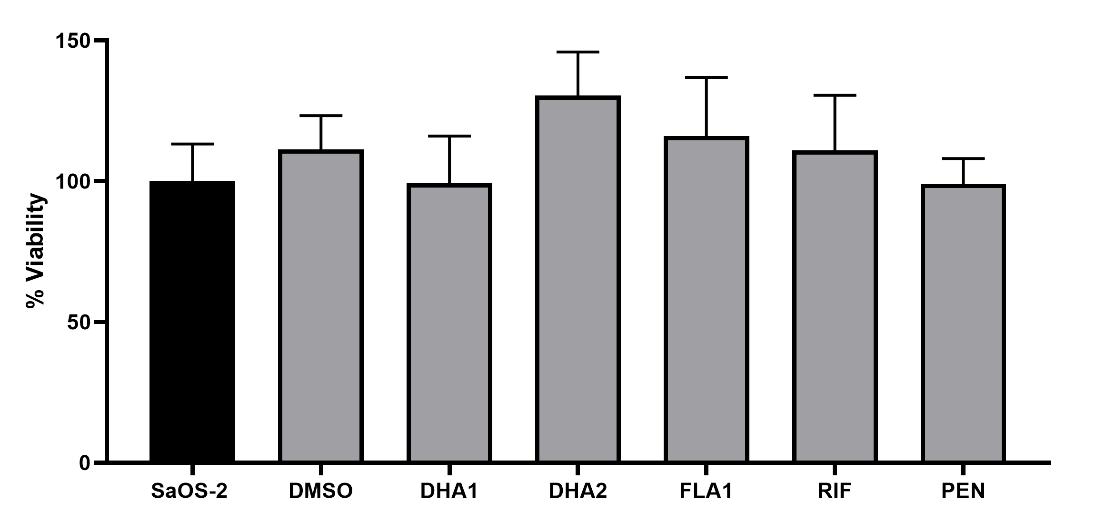


**Figure S4.** Effect of the two DHA derivatives (11 and 9b), the flavonoid-derivative (291) and two control antibiotics (Rifampicin and Penicillin) on SaOS-2 viability when cultured on titanium coupons. Compounds were tested at a concentration of 50 µM. The viability percentage was calculated with respect to untreated controls after 24 h incubation. Results are expressed as mean ± SEM of two different biological replicates.
